# Supplementary material for: Electronic and Optical Properties of Atomic-Scale Heterostructure Based on MXene and MN (M = Al, Ga): A DFT Investigation
Source: MDPI journal article supplement (doi:10.3390/nano11092236), 2021-08-30
Supplement: s1 [file s1]

# Electronic and optical properties of atomically scale heterostructure based on MXene and MN (M = Al, Ga): a DFT investigation

Kai Ren<sup>1,\*</sup>, Ruxin Zheng<sup>1</sup>, Peng Xu<sup>1</sup>, Dong Cheng<sup>1</sup>, Wenyi Huo<sup>1</sup>, Jin Yu<sup>2</sup> Zhuoran Zhang<sup>3</sup> and Qingyun Sun<sup>1,\*</sup>

<sup>1</sup>School of Mechanical and Electronic Engineering, Nanjing Forestry University, Nanjing, Jiangsu, China

<sup>2</sup>School of Materials Science and Engineering, Southeast University, Nanjing, Jiangsu, China

<sup>3</sup>Center for More-Electric-Aircraft Power System, Nanjing University of Aeronautics and Astronautics, Nanjing 211106, China

Corresponding author: kairen@njfu.edu.cn (Kai Ren), sunqingyun@njfu.edu.cn (Qingyun Sun)

**Table S1.** The tested results of the energy for the Hf<sub>2</sub>CO<sub>2</sub>/AlN and Hf<sub>2</sub>CO<sub>2</sub>/GaN systems.

| <i>k</i> -points | Energy (eV)                          |                                      |
|------------------|--------------------------------------|--------------------------------------|
|                  | Hf <sub>2</sub> CO <sub>2</sub> /AlN | Hf <sub>2</sub> CO <sub>2</sub> /GaN |
| 3                | -65.455887                           | -62.773514                           |
| 4                | -65.601831                           | -62.979732                           |
| 5                | -65.649084                           | -63.044835                           |
| 6                | -65.664875                           | -63.066097                           |
| 7                | -65.670985                           | -63.074063                           |
| 8                | -65.673149                           | -63.076884                           |
| 9                | -65.673926                           | -63.077911                           |
| 10               | -65.674286                           | -63.078323                           |
| 11               | -65.674416                           | -63.078500                           |
| 12               | -65.674466                           | -63.078574                           |
| 13               | -65.674520                           | -63.078633                           |
| 14               | -65.674534                           | -63.078639                           |
| 15               | -65.674541                           | -63.078655                           |
| 16               | -65.674545                           | -63.078670                           |
| 17               | -65.674557                           | -63.078658                           |

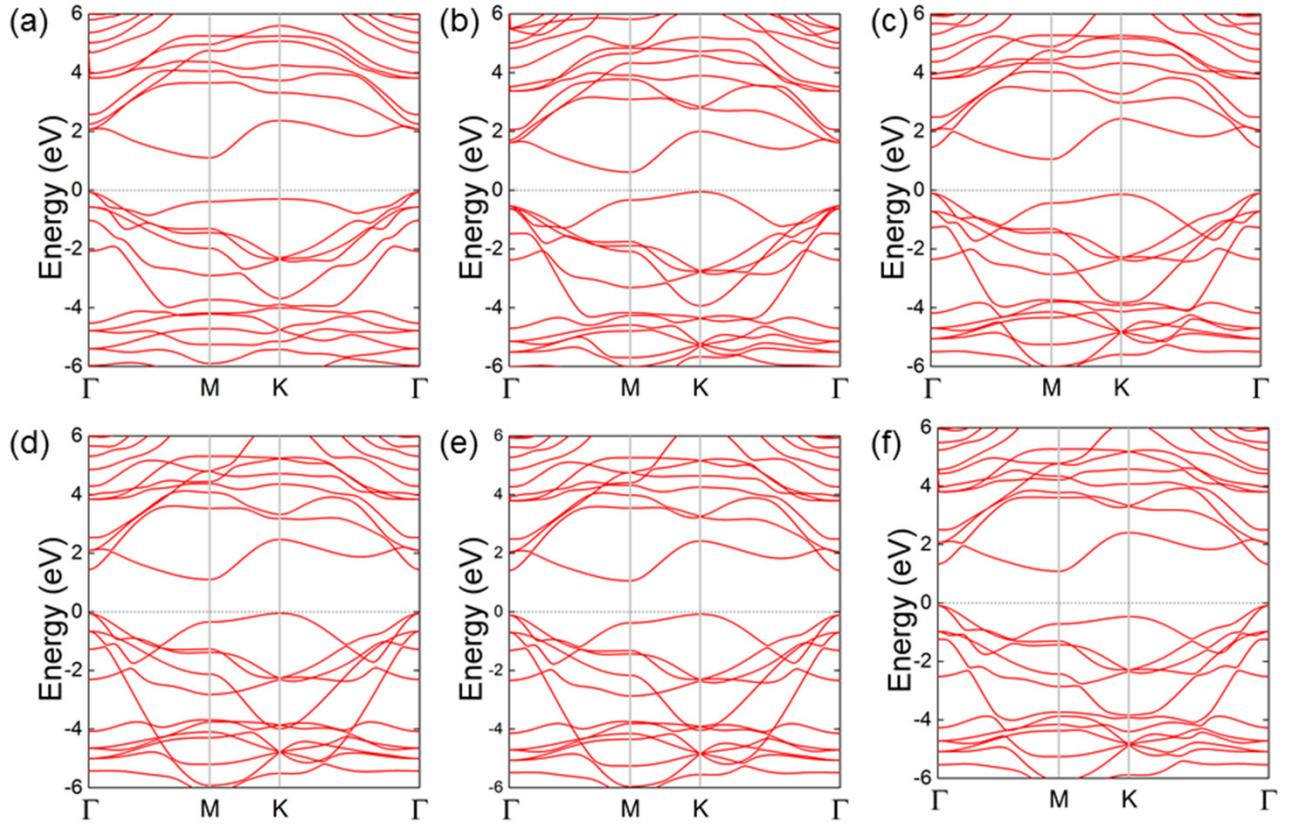

**Figure S1.** The PBE calculated band structure of the (a) AA, (b) AB, (c) AC, (d) AD, (e) AE and (d) AF stacking configurations of the  $\text{Hf}_2\text{CO}_2/\text{AlN}$  vdW heterostructure.

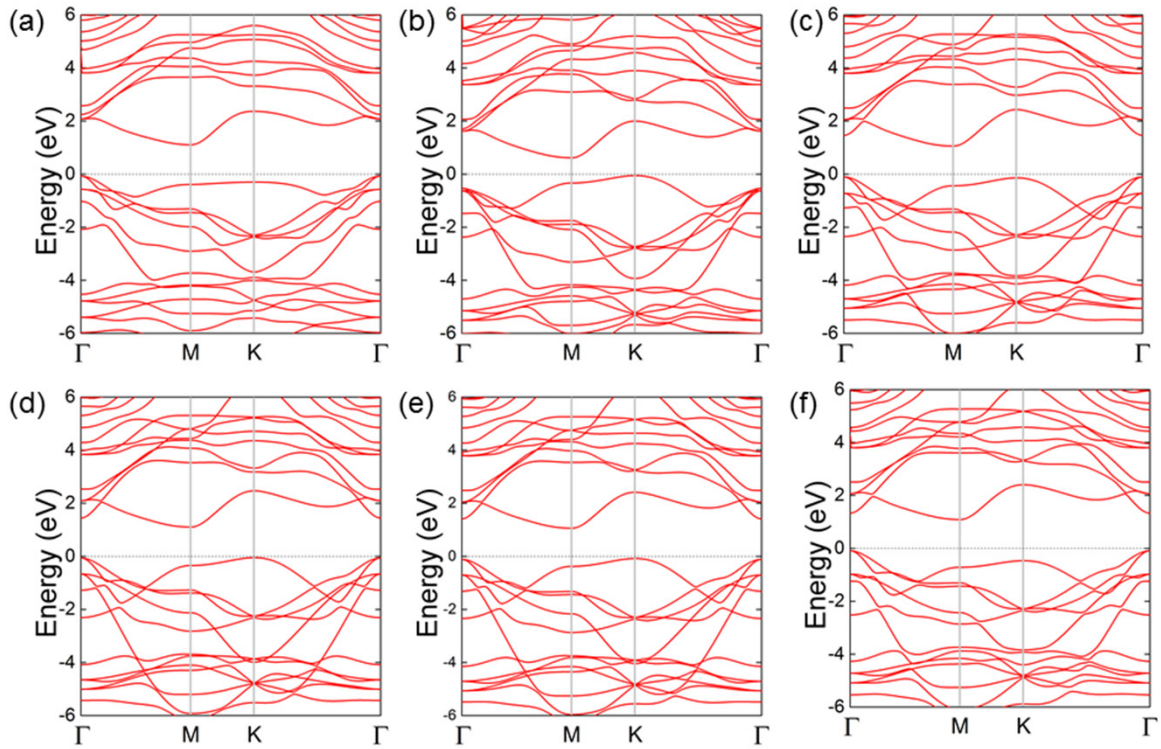

**Figure S2.** The PBE calculated band structure of the (a) AA, (b) AB, (c) AC, (d) AD, (e) AE and (d) AD stacking configurations of the  $\text{Hf}_2\text{CO}_2/\text{AlN}$  vdW heterostructure.

AF stacking configurations of the  $\text{Hf}_2\text{CO}_2/\text{GaN}$  vdW heterostructure.

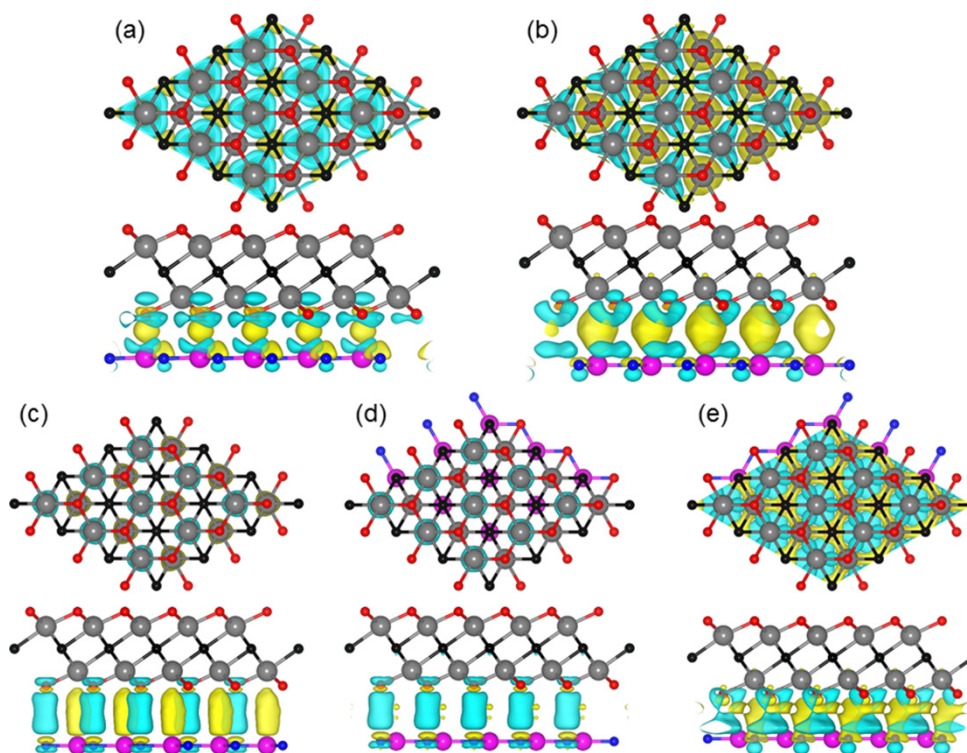

**Figure S3.** The charge density difference of the (a) AA, (b) AB, (c) AC, (d) AD, (e) AE and (f) AF stacking configurations of the  $\text{Hf}_2\text{CO}_2/\text{AlN}$  vdW heterostructure; the yellow demonstration shows the gaining of the electrons while the cyan one means the losing,  $0.0001 |e|$  is used for the isosurface level.

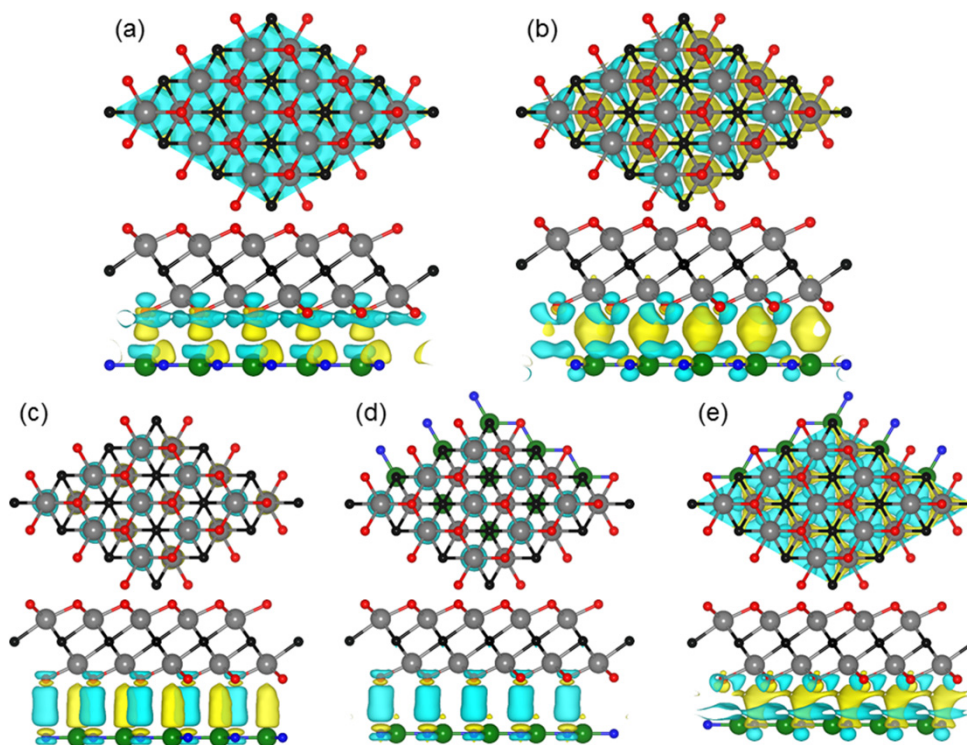

**Figure S4.** The charge density difference of the (a) AA, (b) AB, (c) AC, (d) AD, (e) AE and (d) AF stacking configurations of the  $\text{Hf}_2\text{CO}_2/\text{GaN}$  vdW heterostructure; the yellow demonstration shows the gaining of the electrons while the cyan one means the losing, 0.0001  $|e|$  is used for the isosurface level.

**Table S2.** The electron transfer (unit:  $|e|$ ) between the interface of the  $\text{Hf}_2\text{CO}_2/\text{AlN}$  and  $\text{Hf}_2\text{CO}_2/\text{GaN}$  vdW heterostructures.

|                                     | AA     | AB     | AC     | AD     | AE     | AF     |
|-------------------------------------|--------|--------|--------|--------|--------|--------|
| $\text{Hf}_2\text{CO}_2/\text{AlN}$ | 0.1513 | 0.0928 | 0.0141 | 0.0082 | 0.011  | 0.0296 |
| $\text{Hf}_2\text{CO}_2/\text{GaN}$ | 0.0414 | 0.0121 | 0.0114 | 0.0076 | 0.0097 | 0.0205 |
